# Supplementary material for: Mixed Valanced V3+,V2+ Phosphate Na7V4(PO4)6: A Structural Analogue of Mineral Yurmarinite
Source: MDPI journal article supplement (doi:10.3390/min12121517), 2022-11-27
Supplement: s1 [file s1]

**Table S1.** Atomic coordinates and equivalent anisotropic displacement parameters ( $\text{\AA}^2$ ) for  $\text{Na}_7\text{V}_4(\text{PO}_4)_6$ .

|     | <i>x</i>     | <i>y</i>     | <i>z</i>    | <i>U</i> <sub>iso</sub> */ <i>U</i> <sub>eq</sub> |
|-----|--------------|--------------|-------------|---------------------------------------------------|
| V1  | 0.333333     | 0.666667     | 0.416667    | 0.00407 (17)                                      |
| V2  | 0.54957 (3)  | 0.666667     | 0.416667    | 0.00430 (12)                                      |
| P   | 0.34334 (4)  | 0.48171 (4)  | 0.31090 (3) | 0.00463 (13)                                      |
| Na1 | 0.333333     | 0.666667     | 0.166667    | 0.0070 (4)                                        |
| Na2 | 0.35161 (8)  | 0.45876 (8)  | 0.11161 (5) | 0.0134 (2)                                        |
| O1  | 0.46626 (12) | 0.53587 (12) | 0.34546 (7) | 0.0079 (3)                                        |
| O2  | 0.28737 (12) | 0.34964 (12) | 0.32094 (8) | 0.0077 (3)                                        |
| O3  | 0.26675 (11) | 0.52097 (11) | 0.35447 (7) | 0.0062 (3)                                        |
| O4  | 0.34855 (12) | 0.51928 (12) | 0.23031 (7) | 0.0088 (3)                                        |

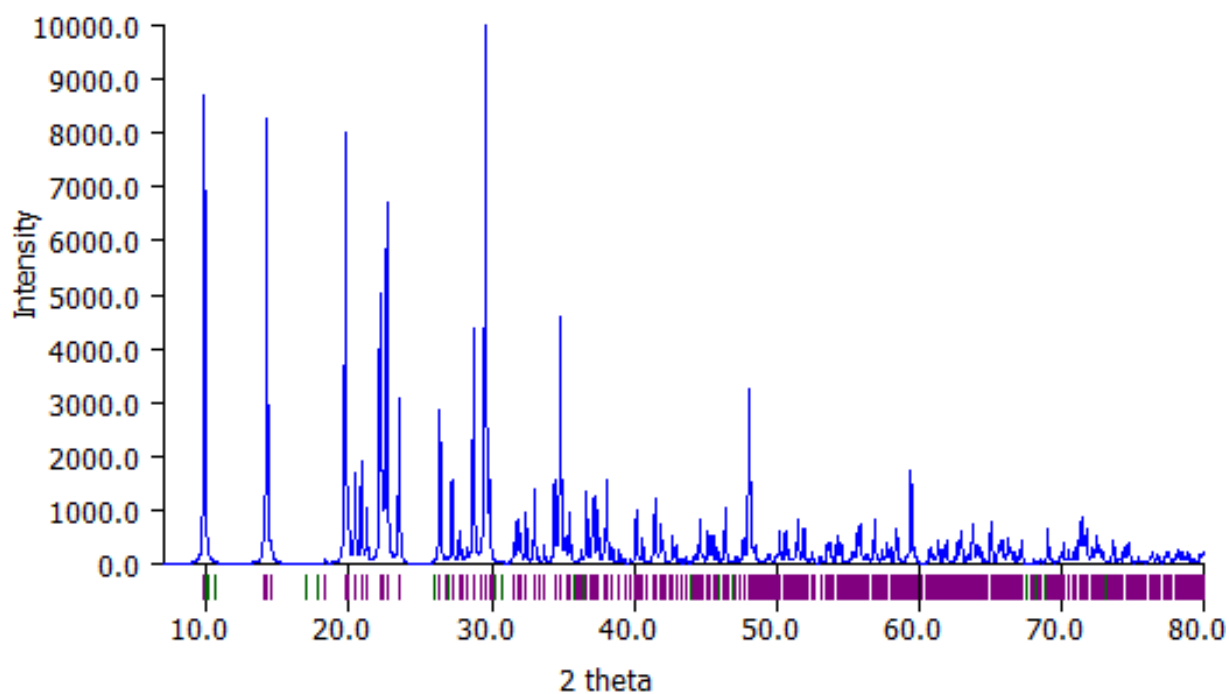

**Figure S1.** Calculated powder pattern\* for  $\text{Na}_7\text{V}_4(\text{PO}_4)_6$ . \*Wavelength: 1.54056
